# Supplementary material
Source: Royal Society of Chemistry journal article supplement (doi:10.1039/d6ce00305b)
Supplement: d6ce00305b1.pdf [file d6ce00305b1.pdf]

## Supplementary information

# Charge transport regulation in $\text{Cu}_{1.94}\text{S-ZnS-Co}_9\text{S}_8$ heterostructures via alignment engineering for photocatalytic hydrogen evolution

Wei Huang Lin,<sup>a</sup> Ying Yang\*,<sup>a</sup> Zhaozhe Chen,<sup>b</sup> Si Xiao,<sup>b</sup> and Weijia Wang\*<sup>c</sup>

- a. School of Metallurgy and Environment, Central South University, Changsha 410083, China.  
E-mail: [muyicaoyang@csu.edu.cn](mailto:muyicaoyang@csu.edu.cn).
- b. School of Physics and Electronics, Central South University, Changsha, 410083, China.
- c. Institute of Clinical Medicine, the Second Affiliated Hospital of Hainan Medical University, Haikou 570311, China. E-mail: [wangweijia@hainmc.edu.cn](mailto:wangweijia@hainmc.edu.cn)

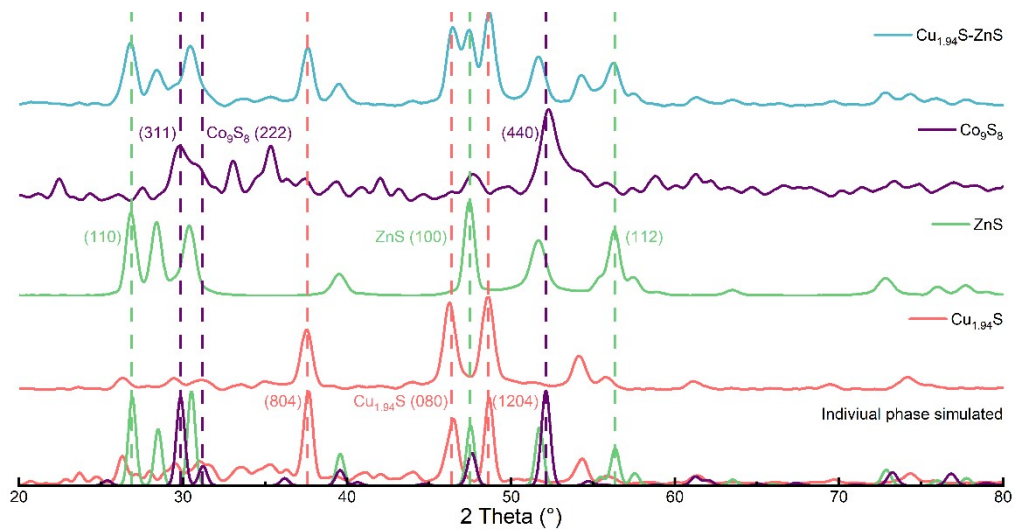

**Fig. S1. Crystallographic analyses:** Powder XRD patterns of  $\text{Cu}_{1.94}\text{S-ZnS}$ ,  $\text{Co}_9\text{S}_8$ ,  $\text{ZnS}$ ,  $\text{Cu}_{1.94}\text{S}$  nanocrystals and individual phase simulated diffraction profiles.

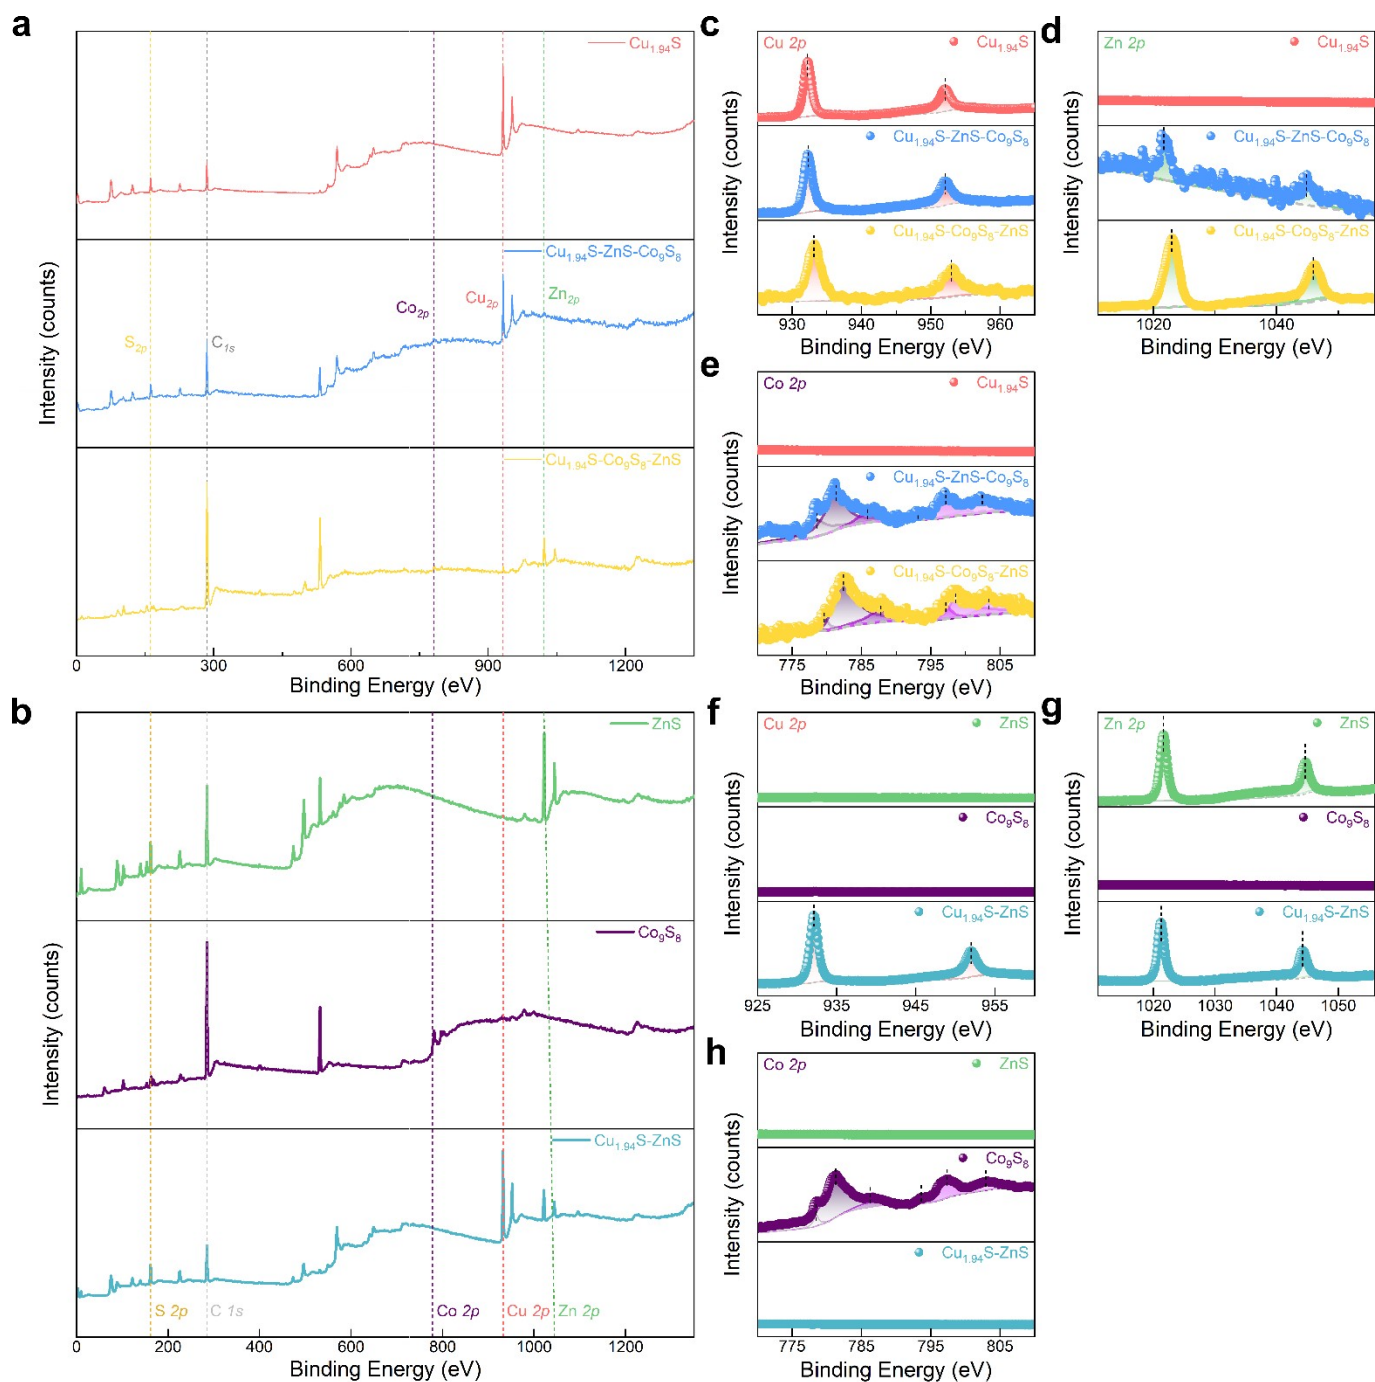

**Fig. S2. Valence state analysis all nano particles:** Full-spectrum XPS of all nanocrystals: (a & b) and high-resolution XPS spectra of  $\text{Cu } 2p$  (c & f),  $\text{Zn } 2p$  (d & g), and  $\text{Co } 2p$  (e & h) for  $\text{Cu}_{1.94}\text{S}$ ,  $\text{Cu}_{1.94}\text{S-ZnS-Co}_9\text{S}_8$ ,  $\text{Cu}_{1.94}\text{S-Co}_9\text{S}_8\text{-ZnS}$ ,  $\text{ZnS}$ ,  $\text{Co}_9\text{S}_8$  and  $\text{Cu}_{1.94}\text{S-ZnS}$ .

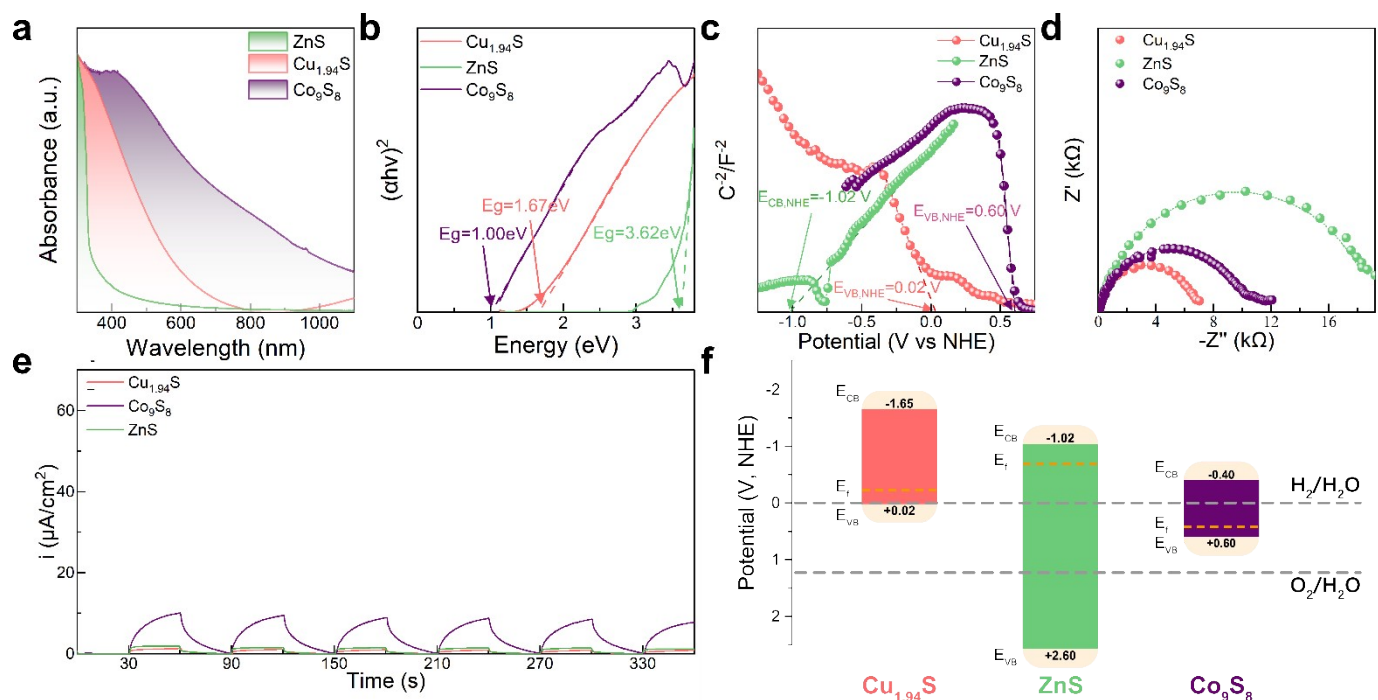

**Fig. S3. Optical and electrochemical characterisations of the as-prepared samples:** (a) Ultraviolet-visible-near infrared (UV-vis-NIR) absorption spectra and (b) corresponding Tauc plots of pristine Cu<sub>1.94</sub>S, ZnS, and Co<sub>9</sub>S<sub>8</sub>. (c) Mott-Schottky plots and extracted flat-band potentials ( $V_{fb}$ ) of the as-prepared samples. (d) Electrochemical impedance spectroscopy (EIS) Nyquist plots recorded under dark conditions. (e) Transient photocurrent density response of pristine individual components and (g) as-prepared binary/ternary NHs under chopped simulated solar irradiation. (f) Band alignment diagram derived from (b) and (c).

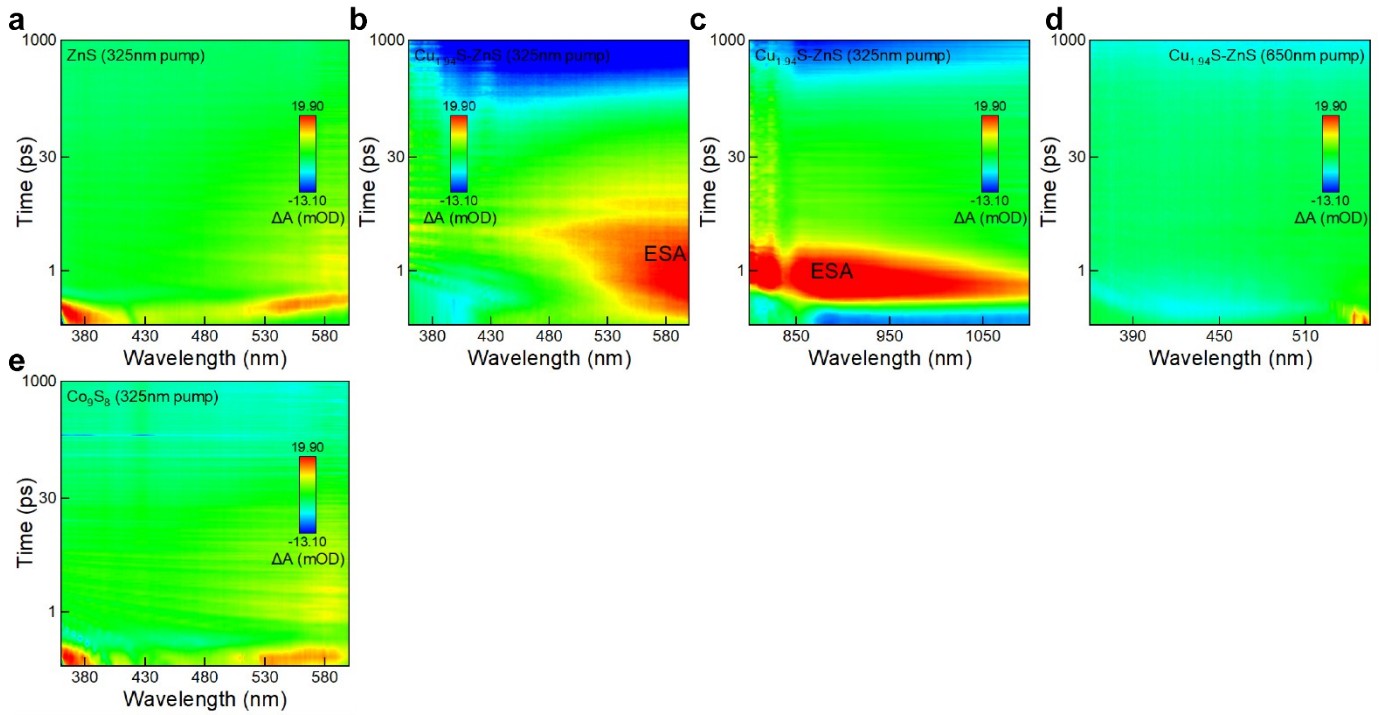

**Fig. S4. Femtosecond transient absorption spectra of ZnS, Cu<sub>1.94</sub>S-ZnS and Co<sub>9</sub>S<sub>8</sub> (pump wavelength at 325/650 nm and probe at UV/NIR) with 2D pseudo color mapping for: (a) ZnS@325 nm pump and UV probe, (b) Cu<sub>1.94</sub>S-ZnS@325 nm pump and UV probe, (c) Cu<sub>1.94</sub>S-ZnS@325 nm pump and NIR probe, (d) Cu<sub>1.94</sub>S-ZnS@650 nm pump and UV probe (e) Co<sub>9</sub>S<sub>8</sub>@325 nm pump and UV probe.**

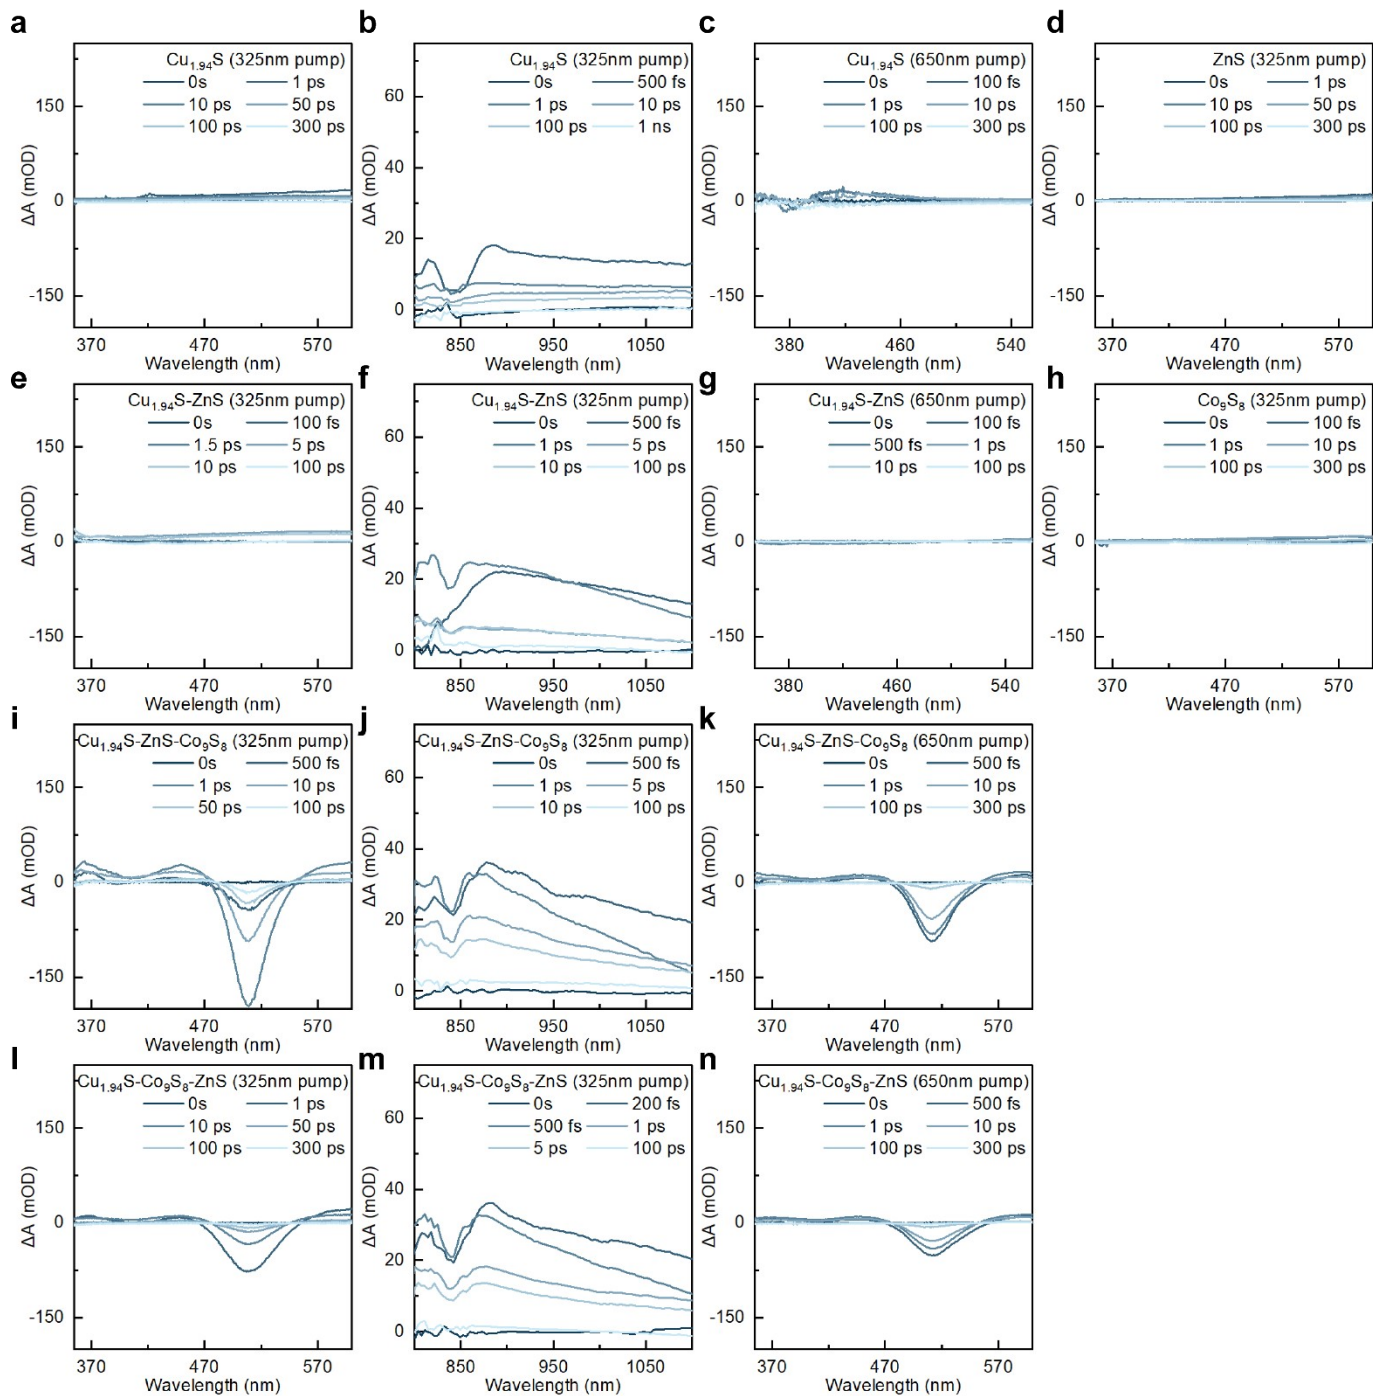

**Fig. S5. Femtosecond transient absorption spectra of all nanocrystals at 325/650 nm and UV/NIR probe for: (a ~ c)  $\text{Cu}_{1.94}\text{S}$ , (d)  $\text{ZnS}$ , (e ~ g)  $\text{Cu}_{1.94}\text{S-ZnS}$ , (h)  $\text{Co}_9\text{S}_8$ , (l ~ k)  $\text{Cu}_{1.94}\text{S-ZnS-Co}_9\text{S}_8$  and  $\text{Cu}_{1.94}\text{S-Co}_9\text{S}_8\text{-ZnS}$ .**

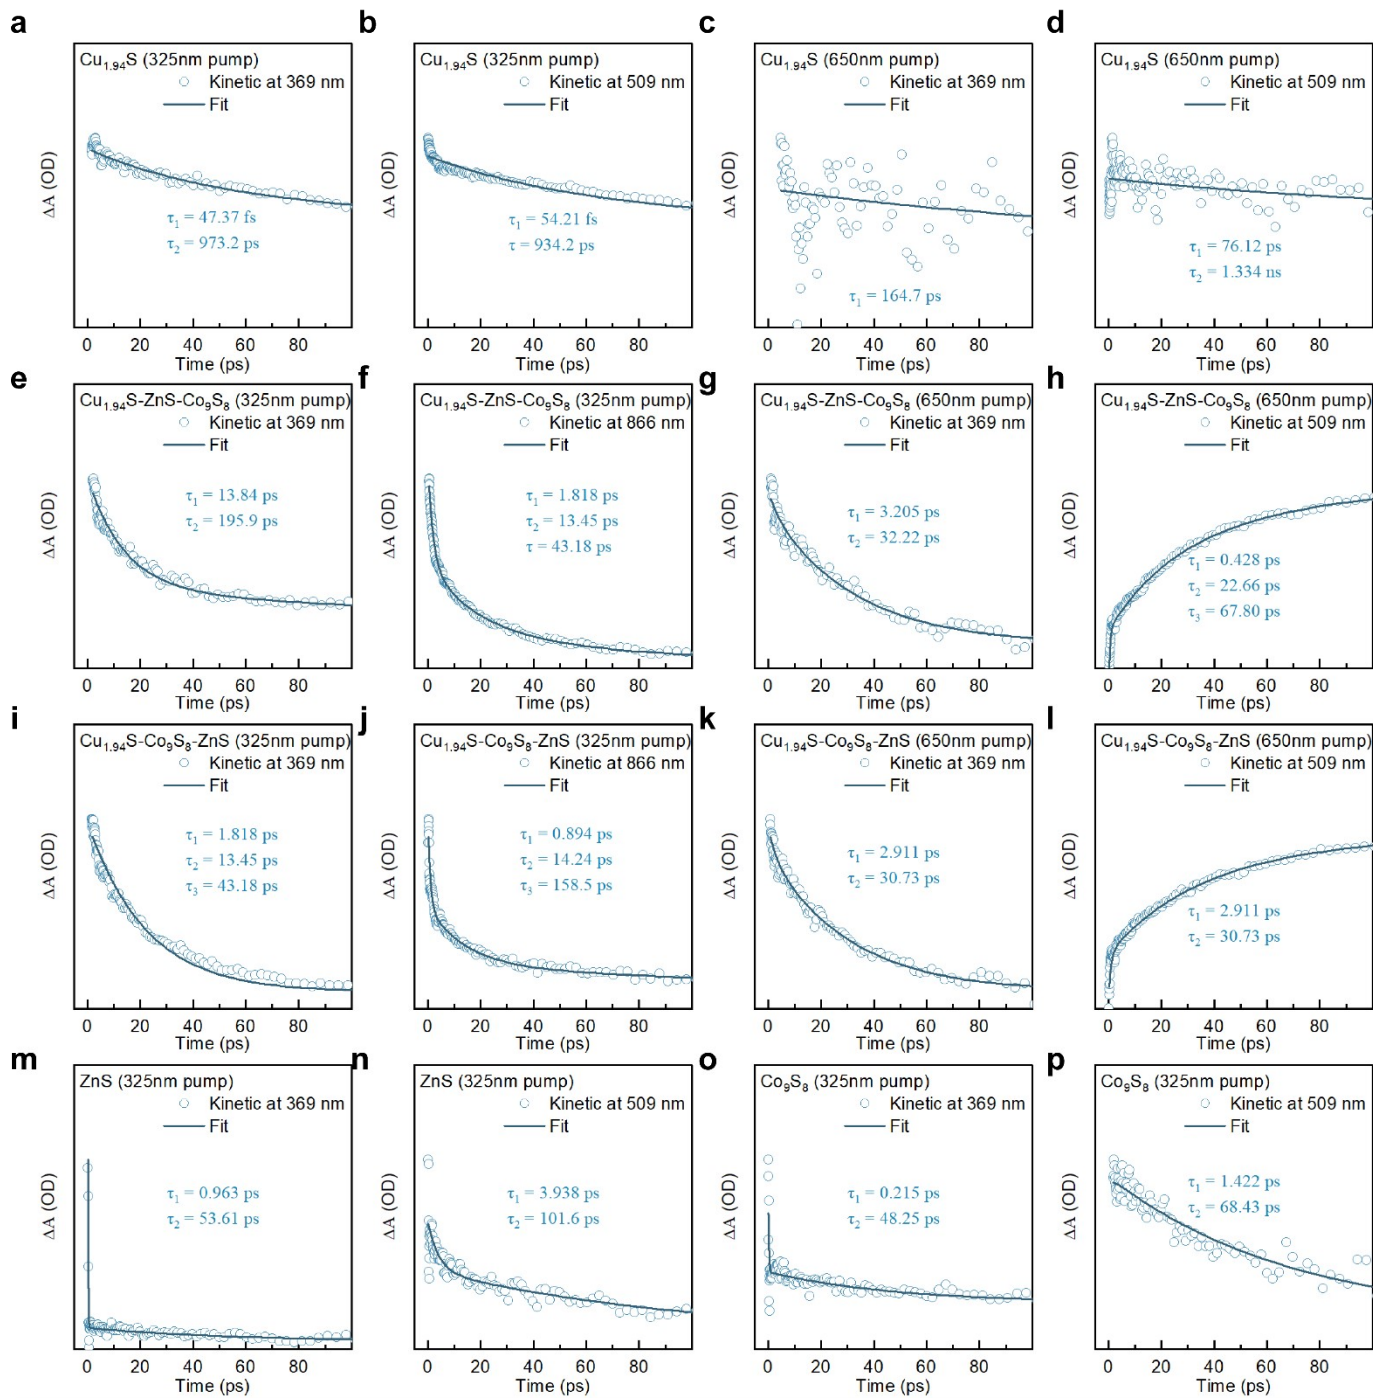

**Fig. S6. Femtosecond transient absorption spectra of kinetic profiles (probing wavelength of 369, 509 and 866 nm) (pump wavelength: 325/650 nm) for: (a ~ d)  $\text{Cu}_{1.94}\text{S}$ , (e ~ h)  $\text{Cu}_{1.94}\text{S-ZnS-Co}_9\text{S}_8$ , (i ~ l)  $\text{Cu}_{1.94}\text{S-Co}_9\text{S}_8\text{-ZnS}$ , (m ~ n) ZnS and (o ~ p)  $\text{Co}_9\text{S}_8$  nanocrystals.**

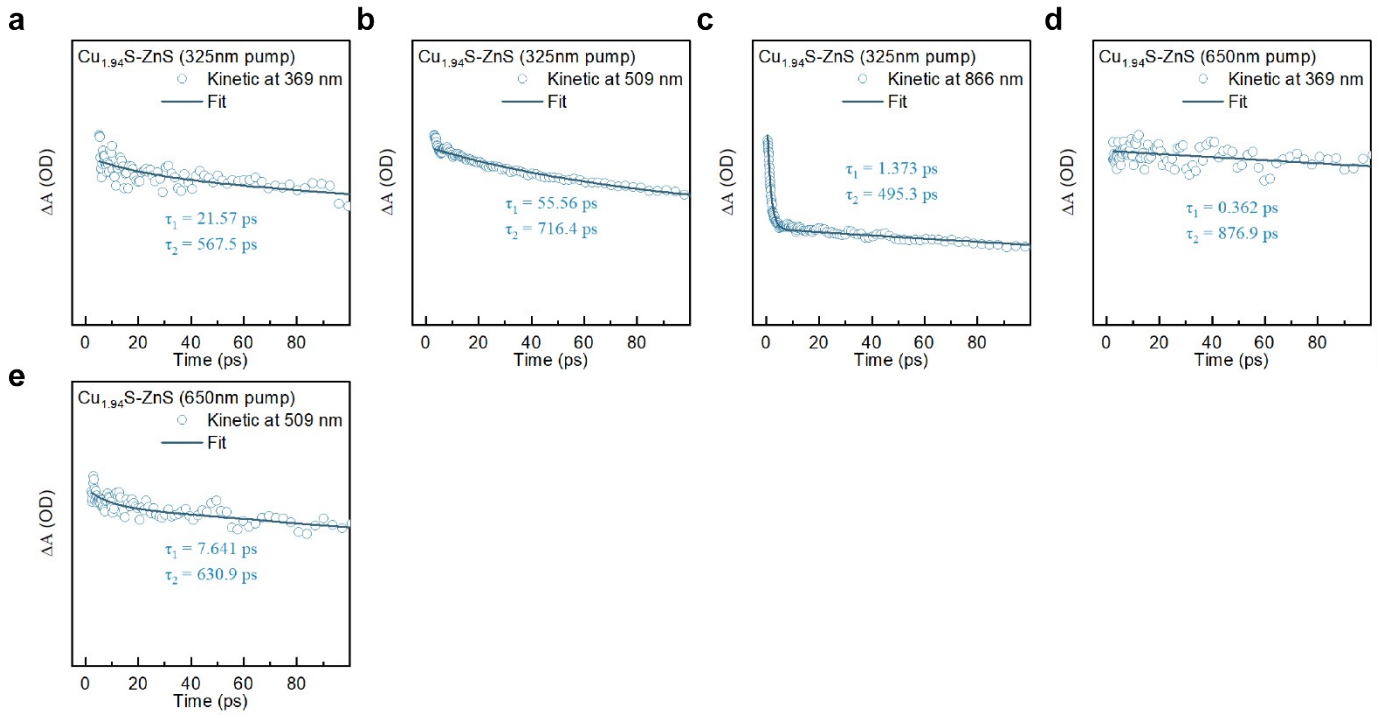

**Fig. S7. Femtosecond transient absorption spectra of kinetic profiles (probing wavelength of 369, 509 and 866 nm) (pump wavelength: 325/650 nm) for: (a ~ e)  $\text{Cu}_{1.94}\text{S-ZnS}$ .**

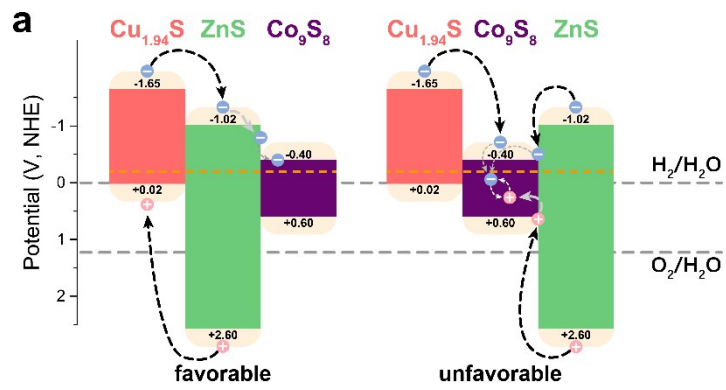

**Fig. S8. Band structure and charge carrier dynamics analysis:** (a) Schematic illustration of the band structures of  $\text{Cu}_{1.94}\text{S}$ - $\text{ZnS}$ - $\text{Co}_9\text{S}_8$ ,  $\text{Cu}_{1.94}\text{S}$ - $\text{Co}_9\text{S}_8$ - $\text{ZnS}$  and interfacial charge transfer.

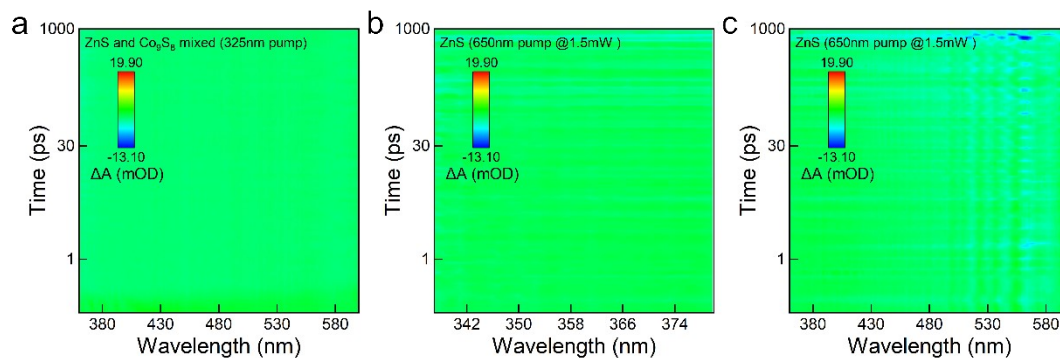

**Fig. S9 Control experiments for the 509 nm GSB signal assignment.** (a) fs-TA 2D pseudocolour map of a physical mixture of ZnS and  $\text{Co}_9\text{S}_8$  nanoparticles under 325 nm pump@0.8 mW, probed in the UV-VIS region. (b) fs-TA 2D pseudocolour map of pristine ZnS under 650 nm pump@1.5 mW, probed in the UV region. (c) fs-TA 2D pseudocolour map of pristine ZnS under 650 nm pump@1.5 mW, probed in the VIS region.

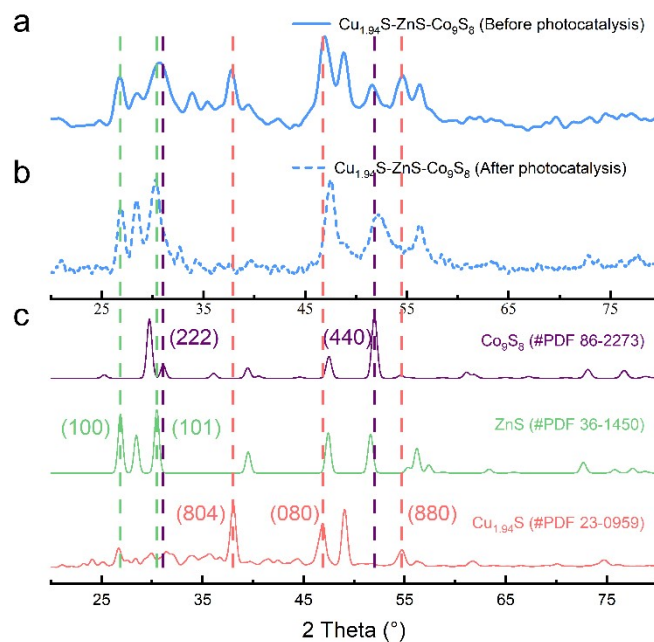

**Fig. S10 XRD patterns of spherical CZC NHs before and after photocatalytic cycling.** (a) XRD pattern of fresh CZC NHs. (b) XRD pattern of CZC NHs after four consecutive HER cycles over 24 h. (c) Simulated diffraction patterns of  $\text{Cu}_{1.94}\text{S}$  (PDF#23-0959),  $\text{ZnS}$  (PDF#36-1450), and  $\text{Co}_9\text{S}_8$  (PDF#86-2273)

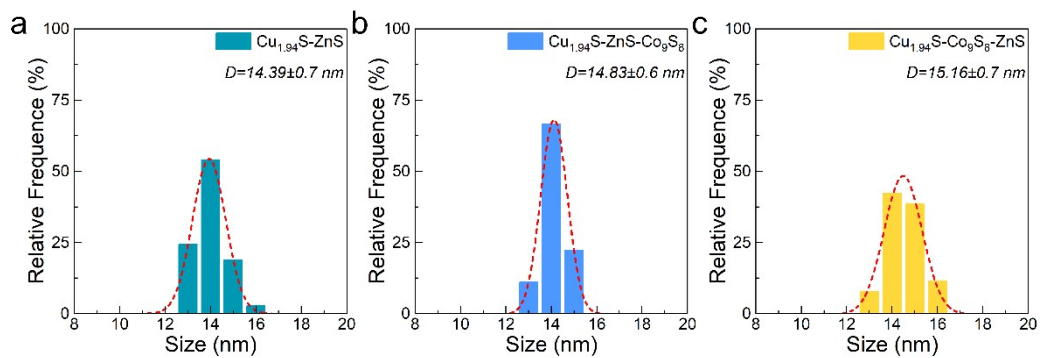

**Fig. S11 TEM particle size distribution histograms.** (a)CZ, (b)CZC and (c)CCZ. Particle diameters were measured from TEM images for each sample.

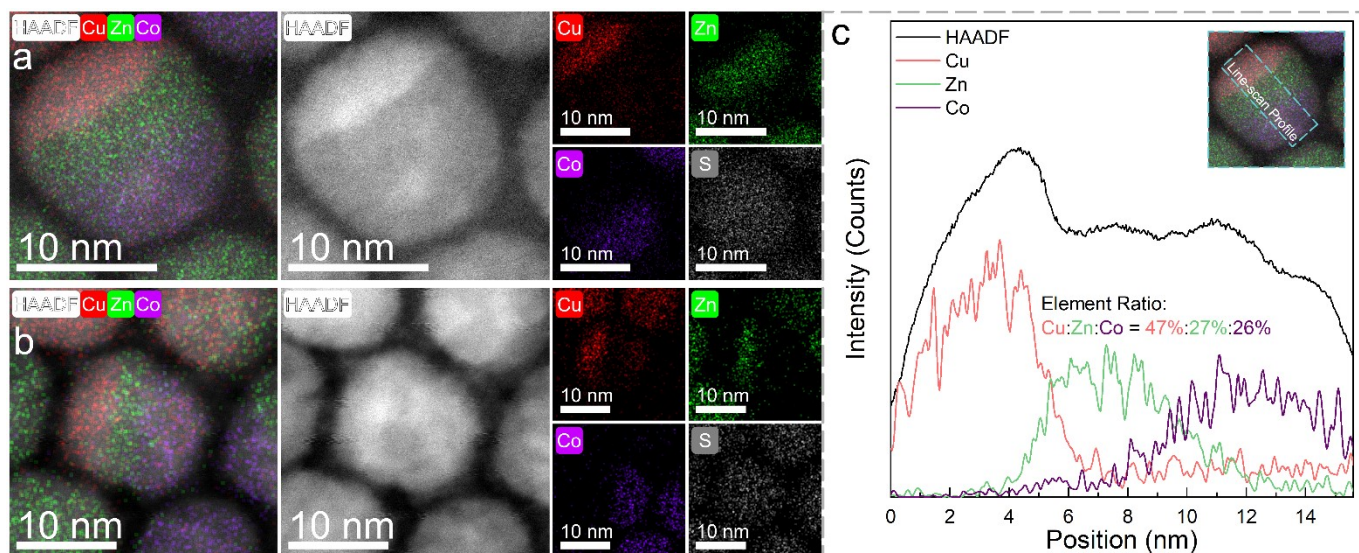

**Fig. S12 STEM-EDS analysis of spherical CZC NHs.** (a) HAADF-STEM image and the corresponding EDS elemental maps of Cu, Zn, Co, and S for a single CZC particle. (b) HAADF-STEM image and EDS elemental maps of a second CZC particle at a different magnification. (c) STEM-EDS line scan profile across the particle shown in (a).

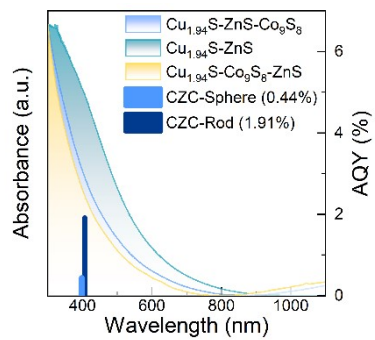

**Fig. S13** UV-vis-NIR absorption spectra of spherical CZ, CZC and CCZ NHs and AQY values of spherical and rod-shaped CZC.

## 4. Experimental section

**Synthesis of Cu<sub>1.94</sub>S Nanosphere:** Spherical Cu<sub>1.94</sub>S nanocrystals were synthesized via a modified thermal decomposition method<sup>1</sup>. The reaction was conducted at 200°C for 120 min, followed by immediate ice-water quenching to obtain a brown colloidal suspension. The product was flocculated with 40 mL ethanol, centrifuged at 8500 rpm for 10 min, and washed with hexane for 3 cycles via dispersion-centrifugation. The final products were stored as hexane colloids (10 mL) or vacuum-dried powders for subsequent use.

**Preparation of precursor solution with Zn<sup>2+</sup> and Co<sup>2+</sup> for cation exchange:** The precursor solution preparation followed a standardized protocol adapted from established cation exchange methodologies<sup>2, 3</sup>. Cobalt (II) and zinc chlorides were first oven-dehydrated (60°C, 24 hrs) to take out remaining moisture. For metal-ligand complex formation, precisely weighed anhydrous CoCl<sub>2</sub> or ZnCl<sub>2</sub> was combined with 24 mmol oleylamine (OLAm, ≈6.42 g) and 30 mmol 1-octadecene (ODE, ≈7.57 g) in a 250 mL three-neck flask equipped with reflux condenser, thermocouple, and argon inlet. The system underwent three vacuum-argon purge cycles via Schlenk line techniques at room temperature to establish an oxygen-free environment. Initial thermal activation involved vacuum heating to 80°C for 30 min to complete ligand dehydration. Under continuous argon run (100 mL·min<sup>-1</sup>), temperature was steadily raised to 200°C where the blend was continued for 30 min to form secure metal-OLAm coordination compound. The resulting precursor solutions were cooled under an inert atmosphere and stored in argon-purged containers with parafilm seals to prevent oxidation prior to cation exchange reactions.

The precursor solutions were prepared via a standardized cation exchange method. Anhydrous CoCl<sub>2</sub>/ZnCl<sub>2</sub> (obtained by oven dehydration at 60 °C for 24 h) was mixed with 24 mmol OLAm and 30 mmol ODE in a three-neck flask. The system was subjected to three vacuum-argon purge cycles at room temperature, then heated to 80 °C under vacuum for 30 min for dehydration. The mixture was further heated to 200 °C under argon flow (100 mL·min<sup>-1</sup>) and held for 30 min to form stable metal-OLAm complexes. The precursor solutions were cooled and stored in argon-purged sealed containers before use.

**Synthesis of binary Cu<sub>1.94</sub>S-ZnS NHs:** Cu<sub>1.94</sub>S-ZnS NHs were synthesized via controlled cation exchange reaction. The Zn-OLAm complex was prepared as described above, and 60 mg of Cu<sub>1.94</sub>S nanospheres were dispersed in 4.36 g TOP via 10 min sonication under argon atmosphere. The colloidal suspension was rapidly injected into the Zn<sup>2+</sup> precursor solution at 100 °C, and the reaction proceeded for 30 min. The product was quenched in an ice-water bath, and isolated via sequential centrifugation and precipitation cycles.

**Synthesis of ZnS and Co<sub>9</sub>S<sub>8</sub> NHs:** ZnS and Co<sub>9</sub>S<sub>8</sub> nanoparticles were synthesized via complete cation exchange reactions. For ZnS synthesis, a cation exchange solution containing 35 mmol ODE, 28.00 mmol OLAm and 1.40 mmol ZnCl<sub>2</sub> was degassed at 100 °C for 30 min under vacuum. 0.50 mmol Cu<sub>1.94</sub>S nanocrystals dispersed in 7.00 mmol ODE and 16.00 mmol TOP were injected into the preheated solution, and the exchange reaction was conducted at 100 °C for 30 min under Ar atmosphere.

Co<sub>9</sub>S<sub>8</sub> nanoparticles were prepared via the same route with modified parameters: the exchange solution contained 30.00 mmol ODE, 24.00 mmol OLAm and 1.20 mmol CoCl<sub>2</sub>; 0.50 mmol Cu<sub>1.94</sub>S nanocrystals were dispersed in 7.00 mmol ODE and 8.00 mmol TOP; the reaction was performed at 80 °C for 30 min under Ar flow. Both products were isolated via ethanol precipitation and stored under inert conditions.

**Characterizations:** The microstructure of the as-prepared nanocrystals was characterized by a field-emission scanning transmission electron microscope (FEI Titan G2 60-300 dual aberration-corrected S/TEM), with elemental distribution analysed via EDS. Phase identification was performed via X-ray diffraction (XRD) on a PANalytical Empyren system. Surface elemental composition and valence states were characterized by X-ray photoelectron spectroscopy (XPS, Thermo Scientific ESCALAB Xi, monochromatic Al K $\alpha$  X-ray, 1486.6 eV). UV-vis-NIR absorption spectra were collected on a Shimadzu UV-1800 spectrophotometer in transmission mode. The as-prepared nanocrystals were thoroughly washed and re-dispersed in n-hexane to form a colloidal solution, and the measurement was performed using a quartz cuvette.

**Hydrophilic surface modifications of NHs and NHs via ligand exchange:** 10 mg of dehydrated photocatalyst was dispersed in 10 mL formic acid containing 3 vol% MPA at ambient temperature. The mixture was sonicated for 20 min to form a homogeneous dispersion, then magnetically stirred for 3 h to complete ligand anchoring. The functionalized photocatalyst was vacuum-dried at 25 °C for 12 h before subsequent tests.

**Photoelectrochemical (PEC) measurements:** PEC tests were performed in a standard three-electrode system, with a photocatalyst-coated FTO glass (1.0 cm × 1.0 cm) as the working electrode, platinum foil as the counter electrode, and Ag/AgCl (3 M KCl) as the reference electrode. The working electrode was prepared by spin-coating a photocatalyst colloidal suspension (1 mg·mL<sup>-1</sup> in deionized water) on FTO substrate, followed by annealing at 300 °C under N<sub>2</sub> atmosphere. Electrochemical tests were conducted on a Metrohm Autolab PGSTAT302N workstation with a μStat-i 400 impedance module, in 0.1 M Na<sub>2</sub>SO<sub>4</sub> electrolyte. Steady-state photocurrents were recorded at 0.4 V vs. Ag/AgCl under simulated solar irradiation (AM 1.5G, 100 mW/cm<sup>2</sup>). Electrochemical impedance spectra (EIS) were collected in the frequency range of 10<sup>5</sup>~10<sup>-1</sup> Hz with 10 mV AC amplitude. Mott-Schottky analysis was performed at 10<sup>3</sup> Hz under dark conditions.

**Table S1.** XPS electron binding energies.

| Sample                                                       | BE(eV) | Elements | Spectral Line     | Sample                                                       | BE(eV) | Elements         | Spectral Line     |
|--------------------------------------------------------------|--------|----------|-------------------|--------------------------------------------------------------|--------|------------------|-------------------|
| Cu <sub>1.94</sub> S NHs                                     | 161.5  | S        | 2p <sub>3/2</sub> | Co <sub>9</sub> S <sub>8</sub> NHs                           | 778.5  | Co <sup>3+</sup> | 2p <sub>3/2</sub> |
| Cu <sub>1.94</sub> S NHs                                     | 162.6  | S        | 2p <sub>1/2</sub> | Co <sub>9</sub> S <sub>8</sub> NHs                           | 793.6  | Co <sup>3+</sup> | 2p <sub>1/2</sub> |
| ZnS NHs                                                      | 161.4  | S        | 2p <sub>3/2</sub> | Co <sub>9</sub> S <sub>8</sub> NHs                           | 781.1  | Co <sup>2+</sup> | 2p <sub>3/2</sub> |
| ZnS NHs                                                      | 162.7  | S        | 2p <sub>1/2</sub> | Co <sub>9</sub> S <sub>8</sub> NHs                           | 797.2  | Co <sup>2+</sup> | 2p <sub>1/2</sub> |
| Co <sub>9</sub> S <sub>8</sub> NHs                           | 162.6  | S        | 2p <sub>3/2</sub> | Co <sub>9</sub> S <sub>8</sub> NHs                           | 785.6  | Co Satellite     | 2p <sub>3/2</sub> |
| Co <sub>9</sub> S <sub>8</sub> NHs                           | 163.9  | S        | 2p <sub>1/2</sub> | Co <sub>9</sub> S <sub>8</sub> NHs                           | 802.7  | Co Satellite     | 2p <sub>1/2</sub> |
| Cu <sub>1.94</sub> S-ZnS NHs                                 | 161.1  | S        | 2p <sub>3/2</sub> | Cu <sub>1.94</sub> S-Co <sub>9</sub> S <sub>8</sub> NHs      | 778.5  | Co <sup>3+</sup> | 2p <sub>3/2</sub> |
| Cu <sub>1.94</sub> S-ZnS NHs                                 | 162.3  | S        | 2p <sub>1/2</sub> | Cu <sub>1.94</sub> S-Co <sub>9</sub> S <sub>8</sub> NHs      | 793.5  | Co <sup>3+</sup> | 2p <sub>1/2</sub> |
| Cu <sub>1.94</sub> S-Co <sub>9</sub> S <sub>8</sub> NHs      | 161.9  | S        | 2p <sub>3/2</sub> | Cu <sub>1.94</sub> S-Co <sub>9</sub> S <sub>8</sub> NHs      | 781.2  | Co <sup>2+</sup> | 2p <sub>3/2</sub> |
| Cu <sub>1.94</sub> S-Co <sub>9</sub> S <sub>8</sub> NHs      | 163.2  | S        | 2p <sub>1/2</sub> | Cu <sub>1.94</sub> S-Co <sub>9</sub> S <sub>8</sub> NHs      | 797.0  | Co <sup>2+</sup> | 2p <sub>1/2</sub> |
| Cu <sub>1.94</sub> S-ZnS-Co <sub>9</sub> S <sub>8</sub> NHs  | 161.7  | S        | 2p <sub>3/2</sub> | Cu <sub>1.94</sub> S-Co <sub>9</sub> S <sub>8</sub> NHs      | 785.9  | Co Satellite     | 2p <sub>3/2</sub> |
| Cu <sub>1.94</sub> S-ZnS-Co <sub>9</sub> S <sub>8</sub> NHs  | 163.0  | S        | 2p <sub>1/2</sub> | Cu <sub>1.94</sub> S-Co <sub>9</sub> S <sub>8</sub> NHs      | 803.0  | Co Satellite     | 2p <sub>1/2</sub> |
| Cu <sub>1.94</sub> S-Co <sub>9</sub> S <sub>8</sub> -ZnS NHs | 162.4  | S        | 2p <sub>3/2</sub> | Cu <sub>1.94</sub> S-ZnS-Co <sub>9</sub> S <sub>8</sub> NHs  | 778.5  | Co <sup>3+</sup> | 2p <sub>3/2</sub> |
| Cu <sub>1.94</sub> S-Co <sub>9</sub> S <sub>8</sub> -ZnS NHs | 163.5  | S        | 2p <sub>1/2</sub> | Cu <sub>1.94</sub> S-ZnS-Co <sub>9</sub> S <sub>8</sub> NHs  | 793.1  | Co <sup>3+</sup> | 2p <sub>1/2</sub> |
| Cu <sub>1.94</sub> S NHs                                     | 932.4  | Cu       | 2p <sub>3/2</sub> | Cu <sub>1.94</sub> S-ZnS-Co <sub>9</sub> S <sub>8</sub> NHs  | 781.3  | Co <sup>2+</sup> | 2p <sub>3/2</sub> |
| Cu <sub>1.94</sub> S NHs                                     | 952.3  | Cu       | 2p <sub>1/2</sub> | Cu <sub>1.94</sub> S-ZnS-Co <sub>9</sub> S <sub>8</sub> NHs  | 797.2  | Co <sup>2+</sup> | 2p <sub>1/2</sub> |
| Cu <sub>1.94</sub> S-ZnS NHs                                 | 932.1  | Cu       | 2p <sub>3/2</sub> | Cu <sub>1.94</sub> S-ZnS-Co <sub>9</sub> S <sub>8</sub> NHs  | 786.4  | Co Satellite     | 2p <sub>3/2</sub> |
| Cu <sub>1.94</sub> S-ZnS NHs                                 | 951.9  | Cu       | 2p <sub>1/2</sub> | Cu <sub>1.94</sub> S-ZnS-Co <sub>9</sub> S <sub>8</sub> NHs  | 802.5  | Co Satellite     | 2p <sub>1/2</sub> |
| Cu <sub>1.94</sub> S-Co <sub>9</sub> S <sub>8</sub> NHs      | 932.3  | Cu       | 2p <sub>3/2</sub> | Cu <sub>1.94</sub> S-Co <sub>9</sub> S <sub>8</sub> -ZnS NHs | 779.4  | Co <sup>3+</sup> | 2p <sub>3/2</sub> |
| Cu <sub>1.94</sub> S-Co <sub>9</sub> S <sub>8</sub> NHs      | 952.1  | Cu       | 2p <sub>1/2</sub> | Cu <sub>1.94</sub> S-Co <sub>9</sub> S <sub>8</sub> -ZnS NHs | 797.2  | Co <sup>3+</sup> | 2p <sub>1/2</sub> |
| Cu <sub>1.94</sub> S-ZnS-Co <sub>9</sub> S <sub>8</sub> NHs  | 932.2  | Cu       | 2p <sub>3/2</sub> | Cu <sub>1.94</sub> S-Co <sub>9</sub> S <sub>8</sub> -ZnS NHs | 782.2  | Co <sup>2+</sup> | 2p <sub>3/2</sub> |
| Cu <sub>1.94</sub> S-ZnS-Co <sub>9</sub> S <sub>8</sub> NHs  | 952.1  | Cu       | 2p <sub>1/2</sub> | Cu <sub>1.94</sub> S-Co <sub>9</sub> S <sub>8</sub> -ZnS NHs | 798.5  | Co <sup>2+</sup> | 2p <sub>1/2</sub> |
| Cu <sub>1.94</sub> S-Co <sub>9</sub> S <sub>8</sub> -ZnS NHs | 933.3  | Cu       | 2p <sub>3/2</sub> | Cu <sub>1.94</sub> S-Co <sub>9</sub> S <sub>8</sub> -ZnS NHs | 786.7  | Co Satellite     | 2p <sub>3/2</sub> |
| Cu <sub>1.94</sub> S-Co <sub>9</sub> S <sub>8</sub> -ZnS NHs | 953.0  | Cu       | 2p <sub>1/2</sub> | Cu <sub>1.94</sub> S-Co <sub>9</sub> S <sub>8</sub> -ZnS NHs | 803.4  | Co Satellite     | 2p <sub>1/2</sub> |
| ZnS NHs                                                      | 1021.6 | Zn       | 2p <sub>3/2</sub> |                                                              |        |                  |                   |
| ZnS NHs                                                      | 1044.7 | Zn       | 2p <sub>1/2</sub> |                                                              |        |                  |                   |
| Cu <sub>1.94</sub> S-ZnS NHs                                 | 1021.2 | Zn       | 2p <sub>3/2</sub> |                                                              |        |                  |                   |
| Cu <sub>1.94</sub> S-ZnS NHs                                 | 1044.3 | Zn       | 2p <sub>1/2</sub> |                                                              |        |                  |                   |
| Cu <sub>1.94</sub> S-ZnS-Co <sub>9</sub> S <sub>8</sub> NHs  | 1022.0 | Zn       | 2p <sub>3/2</sub> |                                                              |        |                  |                   |
| Cu <sub>1.94</sub> S-ZnS-Co <sub>9</sub> S <sub>8</sub> NHs  | 1045.0 | Zn       | 2p <sub>1/2</sub> |                                                              |        |                  |                   |
| Cu <sub>1.94</sub> S-Co <sub>9</sub> S <sub>8</sub> -ZnS NHs | 1022.8 | Zn       | 2p <sub>3/2</sub> |                                                              |        |                  |                   |
| Cu <sub>1.94</sub> S-Co <sub>9</sub> S <sub>8</sub> -ZnS NHs | 1045.8 | Zn       | 2p <sub>1/2</sub> |                                                              |        |                  |                   |

**Table S2.** Femtosecond transient absorption spectra of kinetic profiles

| <b>325 nm pump</b>                                       |                 |             |               |               |               |
|----------------------------------------------------------|-----------------|-------------|---------------|---------------|---------------|
| Sample                                                   | Wavelength (nm) | Signal Type | $\tau_1$ (ps) | $\tau_2$ (ps) | $\tau_3$ (ps) |
| Cu <sub>1.94</sub> S                                     | 369             | GSB         | 47.37         | 973.2         | —             |
|                                                          | 445             | ESA         | 70.35         | 1006          | —             |
|                                                          | 509             | ESA         | 54.21         | 934.2         | —             |
|                                                          | 580             | ESA         | 2.895         | 545.6         | —             |
|                                                          | 817             | ESA         | 0.759         | 174.5         | —             |
|                                                          | 866             | ESA         | 0.557         | 182.6         | —             |
| ZnS                                                      | 369             | —           | 0.096         | 53.61         | —             |
|                                                          | 445             | —           | 0.378         | 58.42         | —             |
|                                                          | 509             | —           | 3.938         | 101.6         | —             |
|                                                          | 580             | —           | 5.03          | 177.4         | —             |
|                                                          | 817             | —           | 0.759         | 174.5         | —             |
|                                                          | 866             | —           | 0.557         | 182.6         | —             |
| Co <sub>9</sub> S <sub>8</sub>                           | 369             | —           | 0.215         | 48.25         | —             |
|                                                          | 445             | —           | 37.26         | 662.8         | —             |
|                                                          | 509             | —           | 1.422         | 68.43         | —             |
|                                                          | 580             | —           | 43.92         | 312.5         | —             |
| Cu <sub>1.94</sub> S-ZnS                                 | 369             | —           | 21.57         | 567.5         | —             |
|                                                          | 445             | —           | 76.15         | 686.9         | —             |
|                                                          | 509             | ESA         | 55.56         | 716.4         | —             |
|                                                          | 580             | ESA         | 10.59         | 619.7         | —             |
|                                                          | 817             | ESA         | 1.227         | 599           | —             |
|                                                          | 866             | ESA         | 1.373         | 495.3         | —             |
| Cu <sub>1.94</sub> S-ZnS-Co <sub>9</sub> S <sub>8</sub>  | 369             | ESA         | 13.84         | 195.9         | —             |
|                                                          | 445             | ESA         | 12.57         | 143.3         | —             |
|                                                          | 509             | GSB         | 1.55          | 12.4          | 46.49         |
|                                                          | 580             | ESA         | 5.136         | 59.81         | —             |
|                                                          | 817             | ESA         | 1.689         | 34.41         | —             |
|                                                          | 866             | ESA         | 1.818         | 13.45         | 43.18         |
| Cu <sub>1.94</sub> S-Co <sub>9</sub> S <sub>8</sub> -ZnS | 369             | ESA         | 0.258         | 21.99         | —             |
|                                                          | 445             | ESA         | 17.33         | 82.69         | —             |
|                                                          | 509             | GSB         | 0.523         | 14.56         | 125.7         |
|                                                          | 580             | ESA         | 5.524         | 51.82         | —             |
|                                                          | 817             | ESA         | 1.647         | 32            | —             |
|                                                          | 866             | ESA         | 0.89          | 14.24         | 158.5         |

**650 nm pump**

| Sample                                                   | Wavelength (nm) | Signal Type | $\tau_1$ (ps) | $\tau_2$ (ps) | $\tau_3$ (ps) |
|----------------------------------------------------------|-----------------|-------------|---------------|---------------|---------------|
| Cu <sub>1.94</sub> S                                     | 369             | ESA         | 164.7         | —             | —             |
|                                                          | 445             | ESA         | 41.3          | 1314          | —             |
|                                                          | 415             | ESA         | 8.261         | 1111          | —             |
|                                                          | 509             | —           | 76.12         | 1334          | —             |
| Cu <sub>1.94</sub> SZnS                                  | 369             | —           | 0.362         | 846.9         | —             |
|                                                          | 445             | —           | 130           | 1622          | —             |
|                                                          | 509             | —           | 7.641         | 630.9         | —             |
|                                                          | 550             | ESA         | 0.078         | 472.8         | —             |
| Cu <sub>1.94</sub> S-ZnS-Co <sub>9</sub> S <sub>8</sub>  | 369             | ESA         | 3.205         | 32.22         | —             |
|                                                          | 445             | ESA         | 0.099         | 37.42         | —             |
|                                                          | 509             | GSB         | 0.43          | 22.66         | 67.8          |
|                                                          | 580             | ESA         | 0.192         | 33.76         | —             |
| Cu <sub>1.94</sub> S-Co <sub>9</sub> S <sub>8</sub> -ZnS | 369             | ESA         | 2.911         | 30.73         | —             |
|                                                          | 445             | ESA         | 0.922         | 40.31         | —             |
|                                                          | 509             | GSB         | 0.916         | 31.54         | 131.5         |
|                                                          | 580             | ESA         | 2.94          | 39.38         | —             |

**Table S3.** Information of Chemicals used in synthesis and experiments.

| Chemicals                  | CAS No.    | Purity | Formula                                                         | Manufacturer                        | Cat. No.  |
|----------------------------|------------|--------|-----------------------------------------------------------------|-------------------------------------|-----------|
| Copper acetylacetonate     | 13395-16-9 | ≥97%   | Cu(acac) <sub>2</sub>                                           | Aladdin Scientific Corp.            | C109323   |
| Zinc chloride              | 7646-85-7  | ≥98%   | ZnCl <sub>2</sub>                                               | Aladdin Scientific Corp.            | Z112526   |
| Cobalt (II) chloride       | 7646-79-9  | 99.7%  | CoCl <sub>2</sub>                                               | Aladdin Scientific Corp.            | C106772   |
| 1-Octadecene               | 112-88-9   | >90%   | C <sub>18</sub> H <sub>36</sub>                                 | Aladdin Scientific Corp.            | O109487   |
| Oleylamine                 | 112-90-3   | 80-90% | C <sub>18</sub> H <sub>37</sub> N                               | Aladdin Scientific Corp.            | O106967   |
| Trioctylphosphine          | 4731-53-7  | 90%    | C <sub>24</sub> H <sub>51</sub> P                               | Aladdin Scientific Corp.            | T106625   |
| <i>Tert</i> -dodecanethiol | 25103-58-6 | 98%    | C <sub>12</sub> H <sub>26</sub> S                               | Aladdin Scientific Corp.            | D106952   |
| 3-Mercaptopropionic acid   | 107-96-0   | 98%    | C <sub>3</sub> H <sub>6</sub> O <sub>2</sub> S                  | Aladdin Scientific Corp.            | M103035   |
| Formamide                  | 75-12-7    | 99%    | CH <sub>3</sub> NO                                              | Aladdin Scientific Corp.            | F103361   |
| Sodium sulfite             | 7757-83-7  | 98%    | Na <sub>2</sub> SO <sub>3</sub>                                 | Aladdin Scientific Corp.            | S112300   |
| Sodium sulfide nonahydrate | 1313-84-4  | ≥98%   | Na <sub>2</sub> S·9H <sub>2</sub> O                             | Aladdin Scientific Corp.            | S299093   |
| Absolute ethanol           | 64-17-5    | ≥99.8% | CH <sub>3</sub> CH <sub>2</sub> OH                              | Sinopharm Chemical Reagent Co. Ltd. | 10009259  |
| Hexane                     | 110-54-3   | ≥97.0% | CH <sub>3</sub> (CH <sub>2</sub> ) <sub>4</sub> CH <sub>3</sub> | Sinopharm Chemical Reagent Co. Ltd. | 800686191 |

**Table S4.** Summary for different systems for hydrogen production.

| Photocatalyst                                                  | HER efficiency<br>( $\mu\text{mol h}^{-1} \text{g}^{-1}$ ) | toxic metal | noble metal | Ref       |
|----------------------------------------------------------------|------------------------------------------------------------|-------------|-------------|-----------|
| $\text{Cu}_{1.94}\text{S-ZnS-Co}_9\text{S}_8$                  | 1047                                                       | no          | no          | This work |
| $\text{CaTiO}_3/\text{CdS}$                                    | 12,381.8                                                   | yes         | no          | 4         |
| $\text{TiO}_2\text{-NiS}_x$                                    | 981.59                                                     | no          | no          | 5         |
| $\text{Cu@TiO}_2\text{-Cu}_2\text{O}$                          | 12,000.6                                                   | no          | no          | 6         |
| $\text{Ni(OH)}_2\text{-TiO}_2\text{-Cu}_2\text{O}$             | 8,384.84                                                   | no          | no          | 7         |
| $\text{Pt/CdS-D}$                                              | 6,295                                                      | yes         | yes         | 8         |
| $\text{ZnIn}_2\text{S}_4/\text{LaNiO}_3$                       | 1,600                                                      | no          | no          | 9         |
| $\text{CoMoO}_4/\text{Carbon Nitride}$                         | 8,350                                                      | no          | no          | 10        |
| $\text{CuO/Carbon Nitride}$                                    | 10,400                                                     | no          | no          | 11        |
| $\text{CdS/Co}_9\text{S}_8$                                    | 1,061                                                      | yes         | no          | 12        |
| $\text{CdS QDs@Co}_9\text{S}_8$                                | 9642.7                                                     | yes         | no          | 13        |
| $\text{Co}_9\text{S}_8/\text{RP}$                              | 1,562.5                                                    | no          | no          | 14        |
| $\text{Co}_9\text{S}_8/\text{Zn}_{0.5}\text{Cd}_{0.5}\text{S}$ | 10,156                                                     | yes         | no          | 15        |
| $\text{Co}_9\text{S}_8/\text{ZnIn}_2\text{S}_4$                | 12,670                                                     | no          | no          | 16        |

**Table S5.** Tri-exponential fitting parameters for the 509 nm GSB kinetics of CZC and CCZ under 325 nm and 650 nm excitation.

**325 nm pump**

| Sample                                                   | Wavelength (nm) | $\tau_1$ (ps) | $A_1$    | $\tau_2$ (ps) | $A_2$    | $\tau_3$ (ps) | $A_3$    | Standard deviation |
|----------------------------------------------------------|-----------------|---------------|----------|---------------|----------|---------------|----------|--------------------|
| Cu <sub>1.94</sub> S-ZnS-Co <sub>9</sub> S <sub>8</sub>  | 509             | 1.55          | -0.05996 | 12.4          | -0.07158 | 46.49         | -0.05615 | 0.00850            |
| Cu <sub>1.94</sub> S-Co <sub>9</sub> S <sub>8</sub> -ZnS | 509             | 0.523         | -0.04283 | 14.56         | -0.03314 | 125.7         | -0.01856 | 0.00329            |

**650 nm pump**

| Sample                                                   | Wavelength (nm) | $\tau_1$ (ps) | $A_1$    | $\tau_2$ (ps) | $A_2$    | $\tau_3$ (ps) | $A_3$    | Standard deviation |
|----------------------------------------------------------|-----------------|---------------|----------|---------------|----------|---------------|----------|--------------------|
| Cu <sub>1.94</sub> S-ZnS-Co <sub>9</sub> S <sub>8</sub>  | 509             | 0.43          | -0.03220 | 22.66         | -0.03634 | 67.8          | -0.03363 | 0.00433            |
| Cu <sub>1.94</sub> S-Co <sub>9</sub> S <sub>8</sub> -ZnS | 509             | 0.916         | -0.01235 | 31.54         | -0.02531 | 131.5         | -0.01165 | 0.00105            |

**Table S6.** Metal ratios of spherical CZC NHs determined by EDS before photocatalysis and by ICP-OES after four consecutive HER cycles over 24 h.

| <b>Photocatalyst</b>                  | <b>Element ratio</b> | <b>Cu (%)</b> | <b>Zn (%)</b> | <b>Co (%)</b> |
|---------------------------------------|----------------------|---------------|---------------|---------------|
| CZC Before photocatalysis (line-scan) |                      | 47            | 27            | 26            |
| CZC After photocatalysis (ICP-OES)    |                      | 36            | 37            | 27            |

## Reference

1. X. Y. Guo, S. Liu, W. J. Wang, et al., *J. Colloid Interface Sci.*, 2021, **600**, 838-846.
2. B. C. Steimle, J. L. Fenton and R. E. Schaak, *Science*, 2020, **367**, 418-424.
3. C. R. McCormick, S. M. Baksa, J. M. Veglak, et al., *Chem. Mater.*, 2023, **35**, 5433-5446.
4. W. Zhang, J. Xiong, S. Li, et al., *Molecular Catalysis*, 2025, **570**, 114701.
5. Y. Wei, G. Cheng, J. Xiong, et al., *Journal of Energy Chemistry*, 2019, **32**, 45-56.
6. P. Qiu, J. Xiong, M. Lu, et al., *J Colloid Interface Sci*, 2022, **622**, 924-937.
7. C. Wang, J. Xiong, Z. Wen, et al., *Industrial & Engineering Chemistry Research*, 2023, **62**, 11402-11413.
8. J. Deng, X. Xu, B. Su, et al., *Materials Horizons*, 2025, **12**, 5702-5709.
9. Z. Wang, B. Su, J. Xu, et al., *Int. J. Hydrog. Energy*, 2020, **45**, 4113-4121.
10. J. Qin, Y. Dong, X. Lai, et al., *J. Mater. Sci. Technol.*, 2024, **198**, 176-185.
11. J. Qin, Y. Zhang, M. Duan, et al., *Int. J. Hydrog. Energy*, 2025, **188**.
12. B. Qiu, Q. Zhu, M. Du, et al., *Angew Chem Int Ed Engl*, 2017, **56**, 2684-2688.
13. Y. Yan, Y. Wu, C. Lu, et al., *Molecules*, 2024, **29**.
14. F. Zhao, M. Zhang, D. Yan, et al., *ACS Applied Nano Materials*, 2023, **6**, 14478-14487.
15. Q. Xu, L. Liu, H. T. Xia, et al., *Colloids Surf., A*, 2023, **667**, 131404.
16. Q. C. Li, Q. F. Lu, E. Y. Guo, et al., *Energy & Fuels*, 2022, **36**, 4541-4548.
